# Supplementary material
Source: PubMed Central journal article supplement (PMC3242902)

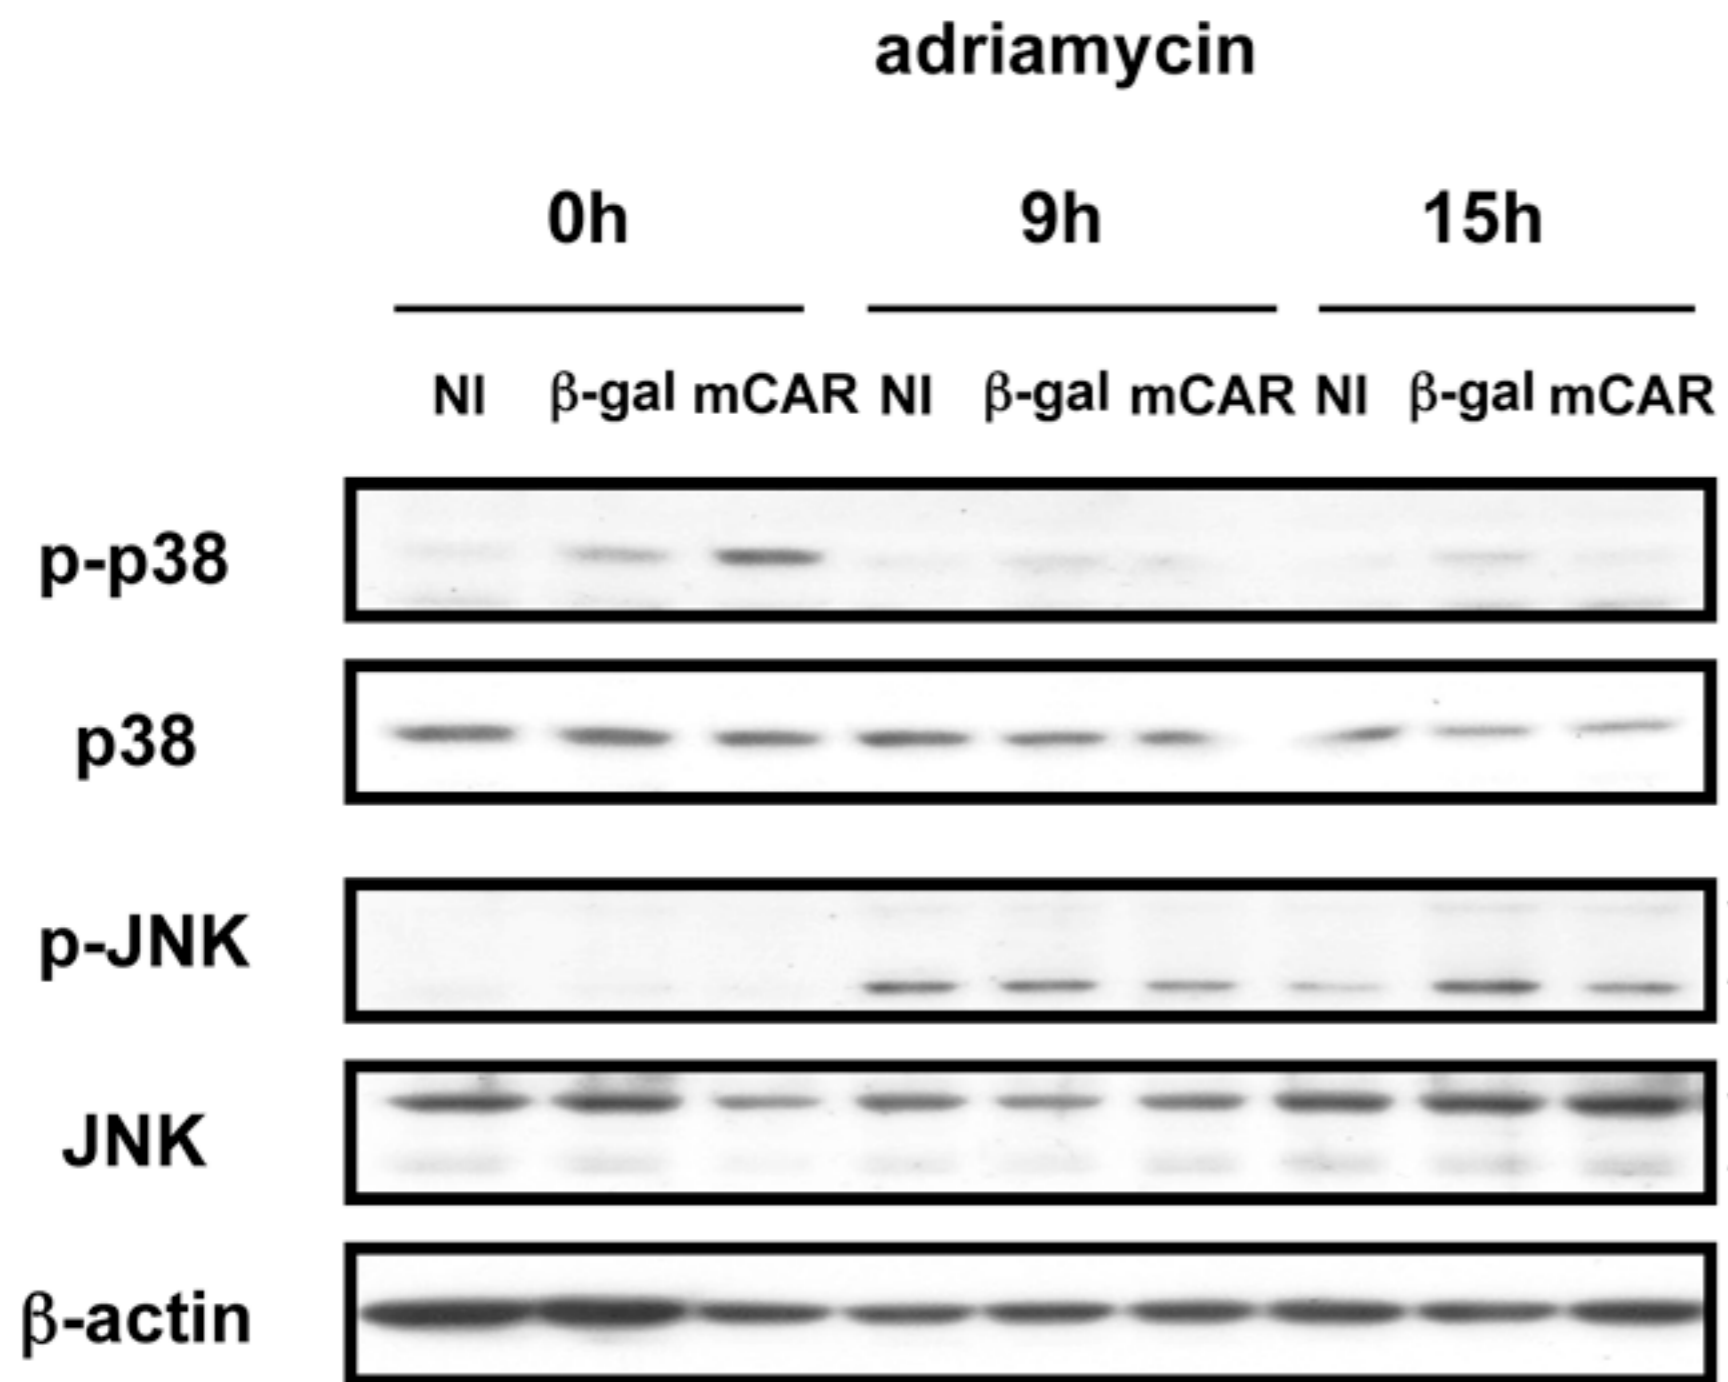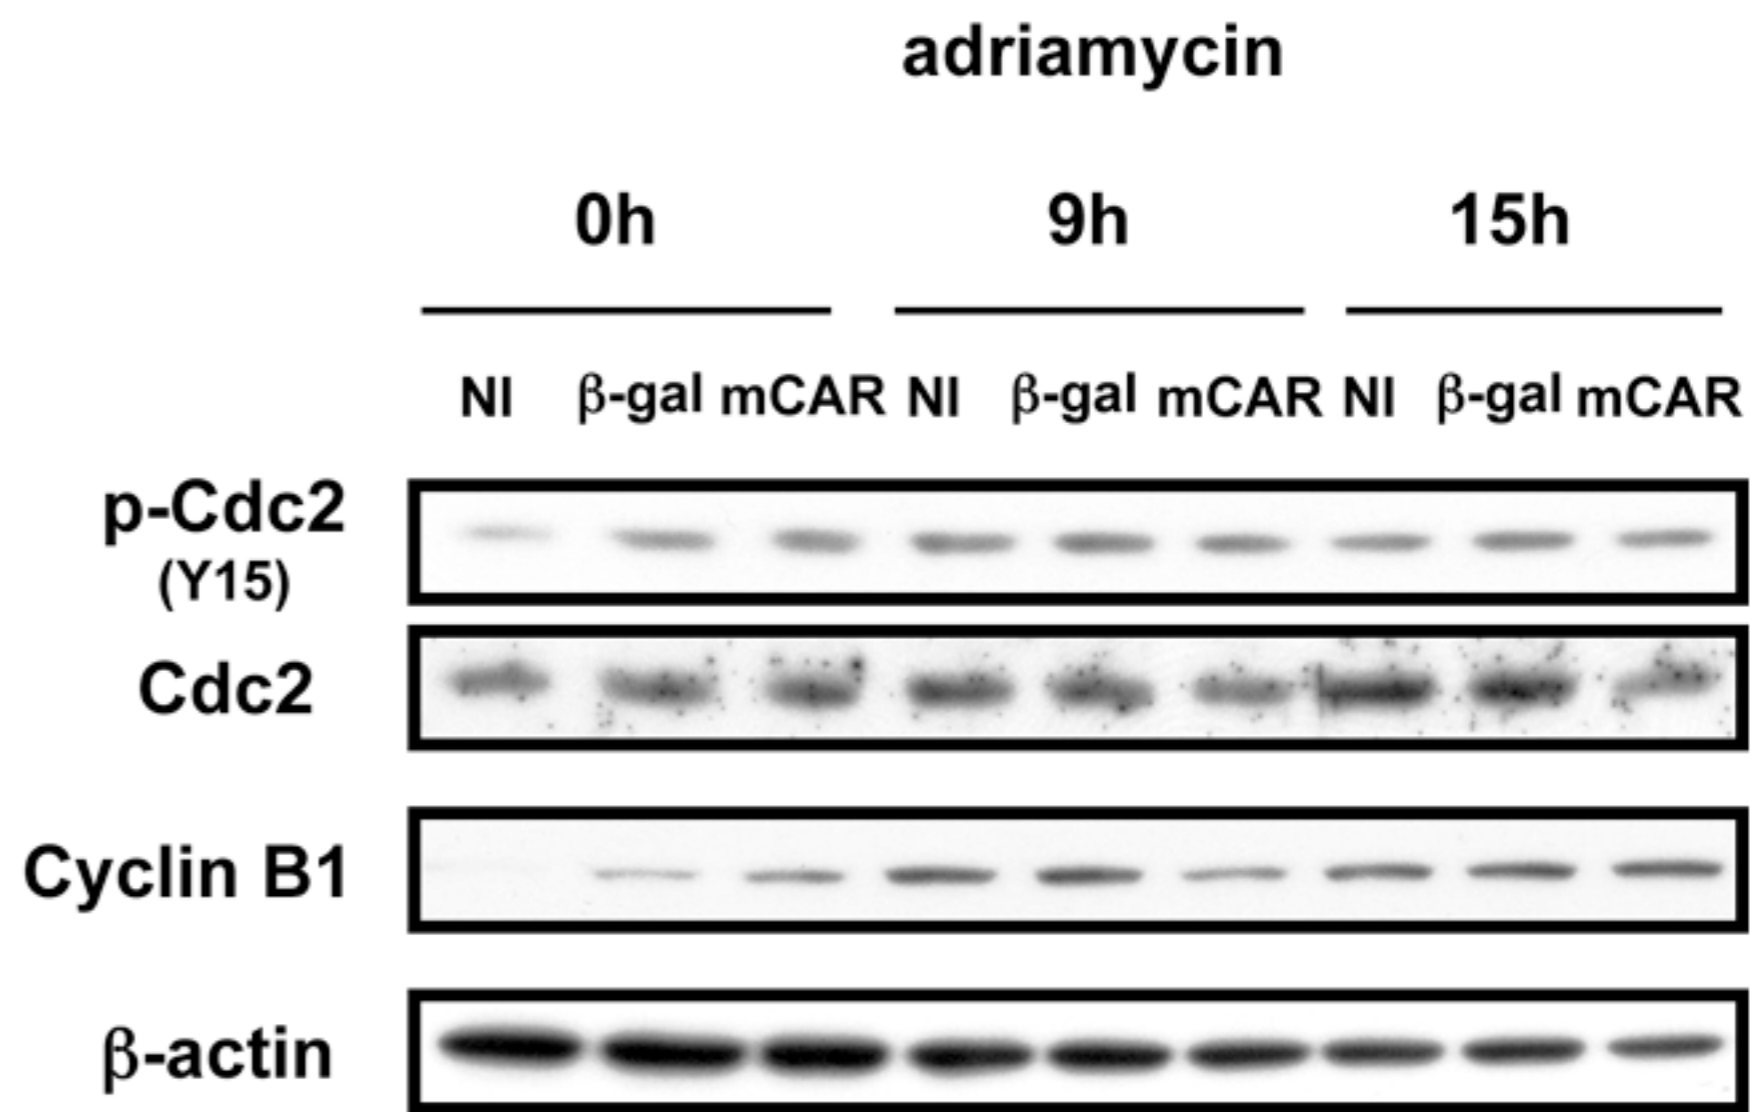

Supplement: NIHMS287419-supplement-Supp_Fig_S1.pdf [file NIHMS287419-supplement-Supp_Fig_S1.pdf]
